# Supplementary material for: LncGSEA: a versatile tool to infer lncRNA associated pathways from large-scale cancer transcriptome sequencing data
Source: BMC Genomics. 2021 Jul 27;22:574. doi: 10.1186/s12864-021-07900-y (PMC8314497; doi:10.1186/s12864-021-07900-y)
Supplement: Supplementary file 2 — Additional file 2: Supplementary Table S5. Top 5 enriched hallmark pathways of 7 lncRNAs predicted by lncGSEA and ncFANs v2.0. Supplementary Table S6. Top 5 enriched GO:BP pathways of 4 lncRNAs predicted by lncGSEA and AnnoLnc2. [file 12864_2021_7900_MOESM2_ESM.xlsx]

## Sheet: Supplementary Table S5.
Supplementary Table S5. Top 5 enriched hallmark pathways of 7 lncRNAs predicted by lncGSEA and ncFANs v2.0
lncRNA (cohort)	Pathway (Literature evidence)	LncGSEA				ncFANs v2.0
		Pathway	p-value	FDR	NES	Pathway	p-value	FDR
PCAT1 (PRAD)	Cell Cycle, Proliferation (Prensner et al., 2014)	HALLMARK_MYC_TARGETS_V1	0.00278552	0.00674218	3.13693	HALLMARK_G2M_CHECKPOINT	0.00038536	0.019268
		HALLMARK_MYC_TARGETS_V2	0.00238663	0.00674218	2.92953	HALLMARK_PANCREAS_BETA_CELLS	0.00175424	0.0438559
		HALLMARK_E2F_TARGETS	0.00269542	0.00674218	2.15698	HALLMARK_TNFA_SIGNALING_VIA_NFKB	0.0072857	0.121428
		HALLMARK_G2M_CHECKPOINT	0.00258398	0.00674218	1.94933	HALLMARK_E2F_TARGETS	0.0120609	0.150761
		HALLMARK_UNFOLDED_PROTEIN_RESPONSE	0.00261097	0.00674218	1.80023	HALLMARK_UNFOLDED_PROTEIN_RESPONSE	0.0163249	0.163249
MEG3 (LUAD)	Activation of p53 (Yan-hua et al., 2015; Lu et al., 2013)	HALLMARK_INTERFERON_ALPHA_RESPONSE	0.00125628	0.0125628	2.46979	HALLMARK_MYC_TARGETS_V1	2.13432e-05	0.00106716
		HALLMARK_EPITHELIAL_MESENCHYMAL_TRANSITION	0.00113766	0.0125628	2.25344	HALLMARK_G2M_CHECKPOINT	0.00290444	0.0726111
		HALLMARK_INTERFERON_GAMMA_RESPONSE	0.00112613	0.0125628	2.10588	HALLMARK_APICAL_JUNCTION	0.00697053	0.0871317
		HALLMARK_COAGULATION	0.00122699	0.0125628	1.74254	HALLMARK_MYOGENESIS	0.00697053	0.0871317
		HALLMARK_P53_PATHWAY	0.00112613	0.0125628	1.56951	HALLMARK_PANCREAS_BETA_CELLS	0.00916938	0.0916938
ARLNC1 (PRAD)	AR signaling (Zhang et al., 2018)	HALLMARK_ANDROGEN_RESPONSE	0.0044843	0.0108425	2.67811	HALLMARK_MYC_TARGETS_V1	5.35503e-06	0.000267751
		HALLMARK_FATTY_ACID_METABOLISM	0.00485437	0.0108425	2.07777	HALLMARK_INTERFERON_ALPHA_RESPONSE	7.1576e-05	0.0017894
		HALLMARK_UNFOLDED_PROTEIN_RESPONSE	0.0046729	0.0108425	1.9167	HALLMARK_TNFA_SIGNALING_VIA_NFKB	0.00022136	0.00368934
		HALLMARK_OXIDATIVE_PHOSPHORYLATION	0.00558659	0.0111732	1.91121	HALLMARK_G2M_CHECKPOINT	0.000383989	0.00479986
		HALLMARK_PROTEIN_SECRETION	0.00896861	0.0160154	1.62872	HALLMARK_IL2_STAT5_SIGNALING	0.000549424	0.00507673
EPIC1 (BRCA)	Cell Cycle (Wang et al., 2018)	HALLMARK_E2F_TARGETS	0.00191939	0.00402317	3.13873	HALLMARK_MYC_TARGETS_V2	0.121244	0.999999
		HALLMARK_MYC_TARGETS_V1	0.0019305	0.00402317	2.85969	HALLMARK_WNT_BETA_CATENIN_SIGNALING	0.140783	0.999999
		HALLMARK_G2M_CHECKPOINT	0.00195695	0.00402317	2.67559	HALLMARK_PANCREAS_BETA_CELLS	0.20976	0.999999
		HALLMARK_MTORC1_SIGNALING	0.0019305	0.00402317	2.3133	HALLMARK_HEDGEHOG_SIGNALING	0.254397	0.999999
		HALLMARK_OXIDATIVE_PHOSPHORYLATION	0.00198807	0.00402317	2.2795	HALLMARK_APICAL_SURFACE	0.451073	0.999999
CTBP1-AS (PRAD)	Cell Cycle and AR transcriptional activity ( Takayama et al., 2013)	HALLMARK_E2F_TARGETS	0.00331675	0.00637836	1.67647	HALLMARK_ESTROGEN_RESPONSE_EARLY	0.00160571	0.0802857
		HALLMARK_G2M_CHECKPOINT	0.031457	0.0491515	1.34954	HALLMARK_APICAL_SURFACE	0.00462802	0.1157
		HALLMARK_ANDROGEN_RESPONSE	0.43554	0.494932	1.00547	HALLMARK_KRAS_SIGNALING_DN	0.0554709	0.924515
		HALLMARK_DNA_REPAIR	0.797697	0.848614	0.866842	HALLMARK_WNT_BETA_CATENIN_SIGNALING	0.0817062	1
		HALLMARK_MYC_TARGETS_V2	0.964029	1	0.647454	HALLMARK_HEDGEHOG_SIGNALING	0.123683	1
SBF2-AS1 (LUAD)	Cell Cycle, Proliferation (Chen et al., 2019)	HALLMARK_E2F_TARGETS	0.00184502	0.00862366	2.43608	HALLMARK_MYC_TARGETS_V1	7.54551e-07	3.77276e-05
		HALLMARK_MYC_TARGETS_V1	0.00185874	0.00862366	2.30466	HALLMARK_UNFOLDED_PROTEIN_RESPONSE	0.000545701	0.0136425
		HALLMARK_OXIDATIVE_PHOSPHORYLATION	0.00186916	0.00862366	2.07448	HALLMARK_G2M_CHECKPOINT	0.00407213	0.0678688
		HALLMARK_G2M_CHECKPOINT	0.0018622	0.00862366	1.93374	HALLMARK_E2F_TARGETS	0.00642202	0.0802753
		HALLMARK_MYC_TARGETS_V2	0.0115607	0.0289017	1.71302	HALLMARK_TGF_BETA_SIGNALING	0.0150246	0.130332
DNM3OS (OV)	EMT (Mitra et al., 2017)	HALLMARK_EPITHELIAL_MESENCHYMAL_TRANSITION	0.00118483	0.00788644	3.14711	HALLMARK_EPITHELIAL_MESENCHYMAL_TRANSITION	2.30854e-23	1.15427e-21
		HALLMARK_APICAL_JUNCTION	0.00122249	0.00788644	2.23215	HALLMARK_UV_RESPONSE_DN	2.74512e-06	6.86281e-05
		HALLMARK_UV_RESPONSE_DN	0.00123457	0.00788644	2.20574	HALLMARK_MYC_TARGETS_V1	1.05893e-05	0.000176488
		HALLMARK_HYPOXIA	0.00120627	0.00788644	2.16428	HALLMARK_TGF_BETA_SIGNALING	0.0122897	0.153622
		HALLMARK_ANGIOGENESIS	0.00157729	0.00788644	2.13572	HALLMARK_HYPOXIA	0.0165082	0.165082

## Sheet: Sheet1
CCAT1(COAD)		HALLMARK_MYC_TARGETS_V1	0.00110497	0.0072812		NA (Note: The following query ncRNAs are invalid identifiers in GENCODE v33 genome reference: ENSG00000247844)
		HALLMARK_MYC_TARGETS_V2	0.00131062	0.0072812
		HALLMARK_G2M_CHECKPOINT	0.00111235	0.0072812
		HALLMARK_E2F_TARGETS	0.00110497	0.0072812
		HALLMARK_PROTEIN_SECRETION	0.00124224	0.0072812
lncRNA	Reflnc	Mitranscriptome	Cohort	Expr.Tech(OEorKD)	Mechanism	Ref	GEO		Pathway4label
DNM3OS	ENST00000417354	T025160	OV	knockdown	DNM3OS inducing ovarian cancer EMT	https://doi.org/10.1038/s41467-017-01781-0	GSE104295	EMT
EPIC1	ENST00000426452	T235647	BRCA	Overexpression/knockdown	EPIC1 promotes cell cycle progression by interacting with MYC through EPIC1’s 129–283 nt region. EPIC1 knockdown reduces the occupancy of MYC to its target genes (e.g., CDKN1A, CCNA2, CDC20, and CDC45)	https://doi.org/10.1016/j.ccell.2018.03.006			MYC
ARLNC1	ENST00000561519	T136805	PRAD	Knockdown	ARLNC1 regulates the cytoplasmic levels of AR transcripts. Furthermore, the transcriptional coupling between AR and ARLNC1 transcripts is mediated by direct interactions that are encoded in their sequences	https://doi.org/10.1038/s41588-018-0120-1	GSE110905		AR
CCAT1	ENST00000500112	T351174 T351189 T351192	COAD	knockdown in mouse xenografts	interacts with transcription factors (e.g., SOX2, p63) to activate expression of genes involved in increasing proliferation and decreasing apoptosis	https://doi.org/10.1073/pnas.1400350111	GSE48877		MYC
CTBP1-AS	ENST00000625256	T259327	PRAD	knockdown, overexpression in mouse xenografts	recruits chromatin modifying, splicing factors to promoter of a nuclear receptor corepressor (CTBP) to decrease its expression, leading to increased oncogenic AR activity	https://doi.org/10.1038/emboj.2013.99			Not Sure (AR probably)
MEG3	ENST00000452514	T110324	LUAD	Overexpression	Decrease cell proliferation and increase apoptosis	https://doi.org/10.1371/journal.pone.0166363			P53 MYC E2F G2M
SBF2-AS1	ENST00000498905	T054676	LUAD	Knockdown/overexpression	promotes proliferation of NSCLC tumor cells;promote cell cycling and cell proliferation in LUAD.	https://doi.org/10.1186/s13046-016-0352-9 https://doi.org/10.1016/j.omtn.2019.04.004	E2F
PCAT1	ENST00000519319	T351126	PRAD	knockdown	PCAT-1–mediated proliferation is dependent on cMyc protein stabilization, and using expression profiling, we observed that cMyc is required for a subset of PCAT-1–induced expression changes	https://doi.org/10.1016/j.neo.2014.09.001			MYC

## Sheet: Supplementary Table S6.
Supplementary Table S6. Top 5 enriched GO:BP pathways of 4 lncRNAs predicted by lncGSEA and AnnoLnc2
lncRNA (cohort)	Pathway (Literature)	LncGSEA				AnnoLnc2
		Pathway	p-value	FDR	NES	Pathway	p-value	FDR
MEG3 (LUAD)	Activation of p53 (Yan-hua et al., 2015; Lu et al., 2013)	collagen fibril organization	0.00126582	0.244677	2.29743	regulation of mast cell activation	0.000653	1
		response to interferon-alpha	0.00153374	0.244677	2.18855	collagen catabolic process	0.000889	1
		response to type I interferon	0.00130548	0.244677	2.10785	response to bronchodilator	0.00116	1
		extracellular matrix organization	0.00106496	0.244677	2.09032	response to amyloid-beta	0.00124	1
		extracellular structure organization	0.00106496	0.244677	2.09032	mast cell activation	0.00133	1
CCAT1 (COAD)	Cell Cycle (Kim et al., 2014)	cell cycle	0.000999001	0.0579223	1.67363	interferon-gamma-mediated signaling pathway	0.000243	1
		biological_process	0.000999001	0.0579223	1.63678	response to bacterium	0.000401	1
		cellular nitrogen compound metabolic process	0.000999001	0.0579223	1.63382	triglyceride metabolic process	0.000438	1
		nucleic acid metabolic process	0.000999001	0.0579223	1.63108	regulation of triglyceride biosynthetic process	0.000482	1
		cellular aromatic compound metabolic process	0.000999001	0.0579223	1.62657	regulation of response to interferon-gamma	0.000611	1
CTBP1-AS (PRAD)	Cell Cycle and AR transcriptional activity ( Takayama et al., 2013)	negative regulation of mRNA processing	0.00183824	0.040255	2.44678	neural crest cell migration	0.00829	1
		negative regulation of mRNA splicing, via spliceosome	0.00189036	0.040255	2.38876	lymphocyte activation involved in immune response	0.0271	1
		negative regulation of RNA splicing	0.00185529	0.040255	2.30746	T cell activation involved in immune response	0.0158	1
		mitotic intra-S DNA damage checkpoint signaling	0.00788955	0.0635513	1.92558	alpha-beta T cell activation involved in immune response	0.00934	1
		histone deubiquitination	0.00548446	0.0508061	1.92225	T cell differentiation involved in immune response	0.0104	1
DNM3OS (OV)	EMT (Mitra et al., 2017)	anatomical structure morphogenesis	0.000999001	0.0286651	2.13147	extracellular matrix organization	2.44e-08	0.000395
		movement of cell or subcellular component	0.000999001	0.0286651	1.99924	extracellular structure organization	6.13e-08	0.000497
		regulation of developmental process	0.000999001	0.0286651	1.97855	blood vessel development	4.78e-05	0.0637
		animal organ development	0.000999001	0.0286651	1.92104	transmembrane receptor protein tyrosine kinase signaling pathway	3.57e-05	0.0637
		cell development	0.000999001	0.0286651	1.91841	response to wounding	2.56e-05	0.0637
